# Supplementary material
Source: publisher figshare collection journal article supplement (https://aacr.figshare.com/ndownloader/files/39841004)

**Supplemental Figure S8.** Western-Blot analysis of c-Jun at 3 months after sham-irradiation or local heart irradiation with 24 Gy. A) Representative image of c-Jun phosphorylated at serines 63 and 73, and total c-Jun in BN and BN/Ka rats. B) Quantification of phosphorylated c-Jun divided by total c-Jun, relative to sham-irradiated samples. Average  $\pm$  SEM, n=6 (\*Significant difference with 0 Gy, #Significant difference between BN and BN/Ka,  $p < 0.01$ ).

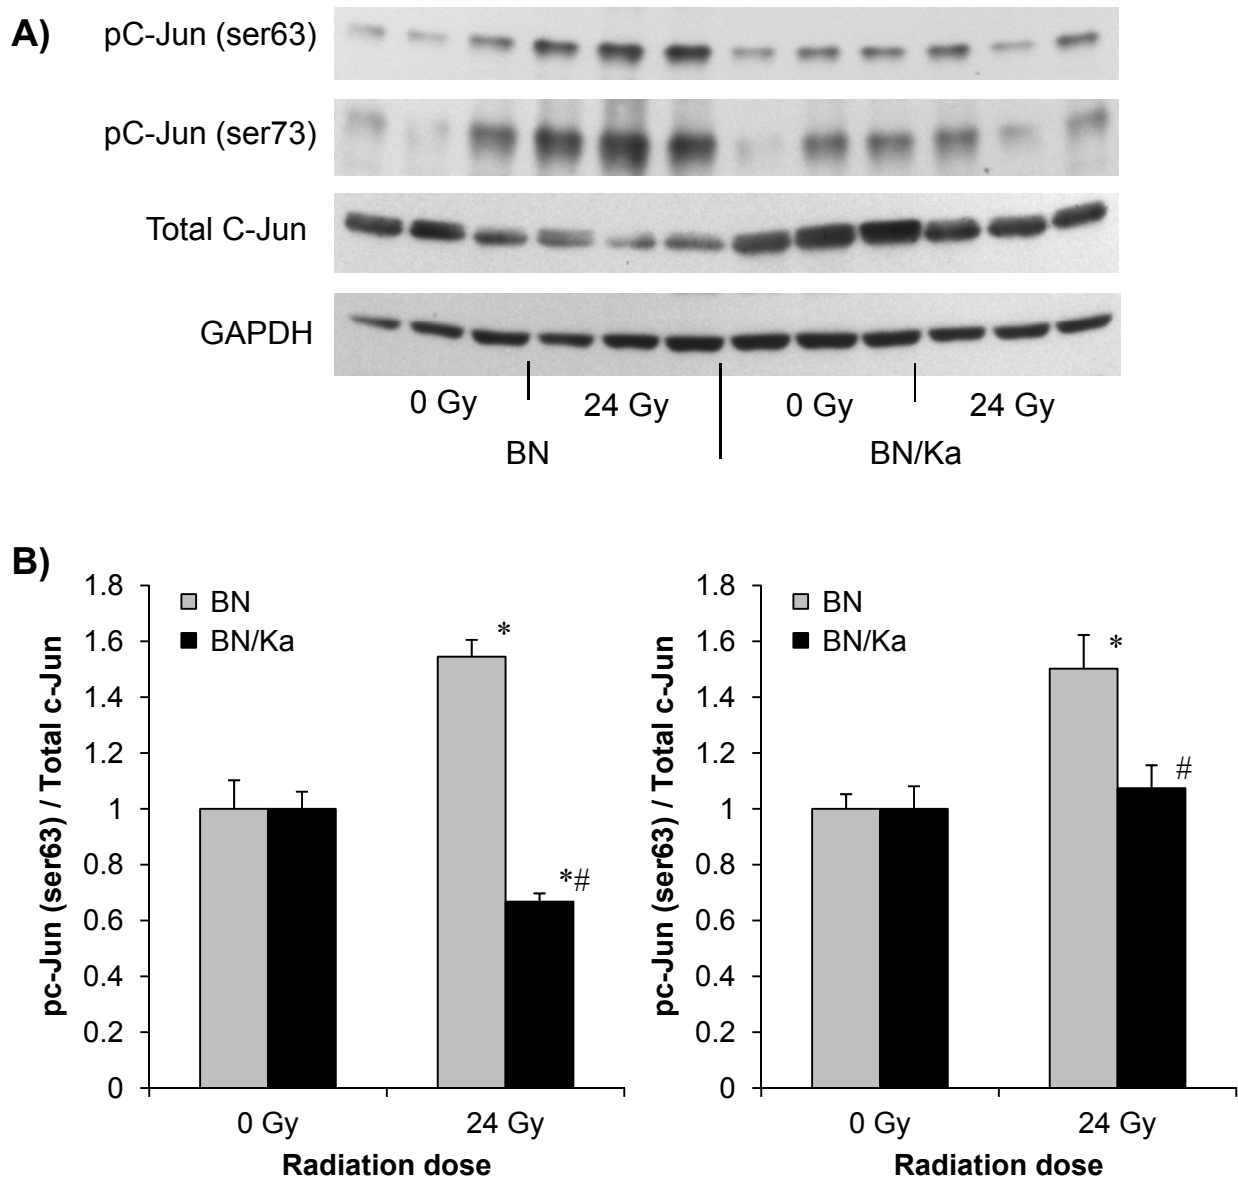

Supplement: Supplementary file 1 [file 39841004]
